# Supplementary material for: Improving the charge transport performance of solution-processed organic field-effect transistors using green solvent additives
Source: Royal Society of Chemistry journal article supplement (doi:10.1039/d1tc03782j), 2021-01-01
Supplement: d1tc03782j1.pdf [file d1tc03782j1.pdf]

Electronic Supplementary Information

## **Improving Charge Transport Performance of Solution-Processed Organic Electronic Devices Using Green Solvent Additives**

Yongchul Lee,<sup>a</sup> Dongil Ho,<sup>a</sup> Federica Valentini,<sup>b</sup> Assunta Marrocchi,<sup>\*b</sup> Luigi Vaccaro,<sup>\*b</sup>  
Choongik Kim.<sup>\*a</sup>

<sup>a</sup> Department of Chemical and Biomolecular Engineering, Sogang University, 1 Shinsoo-dong, Mapo-gu, Seoul 04107, Republic of Korea

<sup>b</sup> Laboratory of Green Synthetic Organic Chemistry, Dipartimento di Chimica, Biologia e Biotecnologie, Università di Perugia ViaElce di Sotto, 8, 06123 Perugia, Italy.

E-mail addresses: C. Kim (choongik@sogang.ac.kr), L. Vaccaro (luigi.vaccaro@unipg.it), A. Marrocchi (assunta.marrocchi@unipg.it)

Keywords: Organic field-effect transistor; green solvent; binary solvent mixture; charge carrier mobility; solution-process

**Table S1.** Summary of the optimized conditions for solution-processed OFETs from different solvents. For TIPS-pentacene, C<sub>8</sub>-BTBT, TU-3 and ambipolar semiconductor films, solution-shearing method was used, and for P(NDI2OD-T2) films, conventional spin-coating method was used. For all fabricated films, thermal annealing was employed for 2 hr to remove residual solvent. (TOL: toluene, AA: n-amyl acetate, CF: chloroform, 2-MeTHF: 2-methyl tetrahydrofuran, CB: chlorobenzene, DES: diethyl succinate)

| Semiconductor                       | Used Solvent (Mixing Ratio)          | Substrate Temperature (°C) | Shearing Speed (mm/min) | Annealing Temperature (°C) |
|-------------------------------------|--------------------------------------|----------------------------|-------------------------|----------------------------|
| TIPS-pentacene                      | Single TOL<br>or<br>TOL and AA       | 60                         | 10                      | 90                         |
| C <sub>8</sub> -BTBT                | Single CF<br>or<br>CF and 2-MeTHF    | 30                         | 5                       | 50                         |
| TU-3                                | single CB<br>or<br>CB and DES        | 90                         | 5                       | 105                        |
| TIPS-pentacene<br>&<br>P(NDI2OD-T2) | Single TOL<br>or<br>TOL and AA (8:2) | 60                         | 10                      | 90                         |

<sup>a</sup> Optimized solution concentrations for each semiconductor solution were 4 mg/mL, 2 mg/mL, 1 mg/mL, 5 mg/mL for TIPS-pentacene, C<sub>8</sub>-BTBT, TU-3 and blended solution of TIPS-pentacene & P(NDI2OD-T2), respectively.

| Semiconductor <sup>a</sup> | Used Solvent                      | Spin Rate (RPM) | Spin Time (s) | Annealing Temperature (°C) |
|----------------------------|-----------------------------------|-----------------|---------------|----------------------------|
| P(NDI2OD-T2)               | Single TOL<br>or<br>TOL and AA    | 600             | 50            | 90                         |
| P(NDI2OD-T2)               | Single CF<br>or<br>CF and 2-MeTHF | 600             | 50            | 50                         |

<sup>a</sup> Concentration of 6 mg/mL P(NDI2OD-T2) solution was employed for fabrication of optimized n-type polymer film.

**Table. S2** Performance parameters of ambipolar OFETs consisting of various semiconductor blending ratio with toxic single TOL and with TOL and AA (8:2) for optimized blending ratio of semiconductor film. (TOL: toluene, AA: n-amyl acetate)

| Ratio P:N<br>(solvent) | P-channel                           |                                  | N-channel                            |                                  |
|------------------------|-------------------------------------|----------------------------------|--------------------------------------|----------------------------------|
|                        | $\mu_h$ (cm <sup>2</sup> /Vs)       | $I_{on}/I_{off}$<br>$V_{th}$ (V) | $\mu_e$ (cm <sup>2</sup> /Vs)        | $I_{on}/I_{off}$<br>$V_{th}$ (V) |
| 1:1 (TOL)              | 0.32<br>2.2×10 <sup>1</sup><br>-13  |                                  | not active                           |                                  |
| 1:2 (TOL)              | not active                          |                                  | 0.0099<br>1.5×10 <sup>1</sup><br>17  |                                  |
| 1:3 (TOL)              | not active                          |                                  | 0.016<br>2.6×10 <sup>3</sup><br>-3.9 |                                  |
| 1:4 (TOL)              | not active                          |                                  | 0.022<br>7.4×10 <sup>3</sup><br>5.3  |                                  |
| 2:3 (TOL)              | 0.037<br>8.2×10 <sup>0</sup><br>-44 |                                  | 0.0076<br>1.6×10 <sup>1</sup><br>21  |                                  |
| 2:3 (TOL & AA)         | 0.075<br>9.4×10 <sup>0</sup><br>-28 |                                  | 0.0182<br>2.0×10 <sup>1</sup><br>12  |                                  |

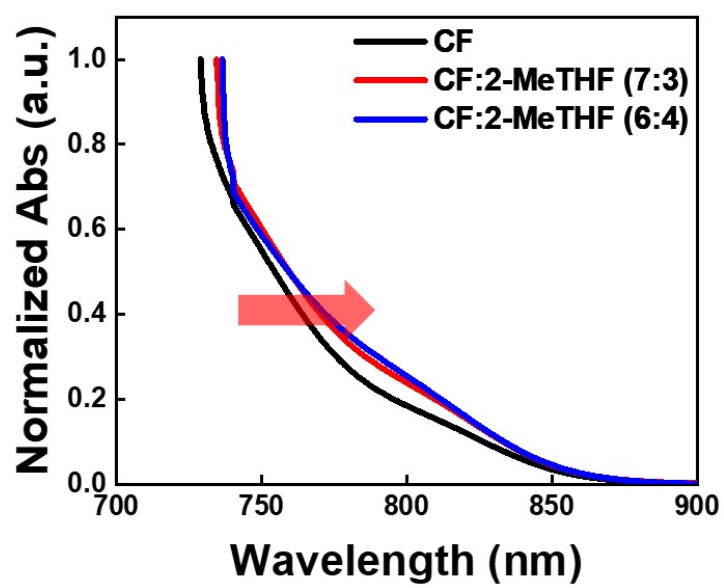

**Fig. S1** UV-vis absorption spectra of P(NDI2OD-T2) solution with solution concentration of  $\sim 10^{-6}$  M. (CF: chloroform, 2-MeTHF: 2-methyl tetrahydrofuran).

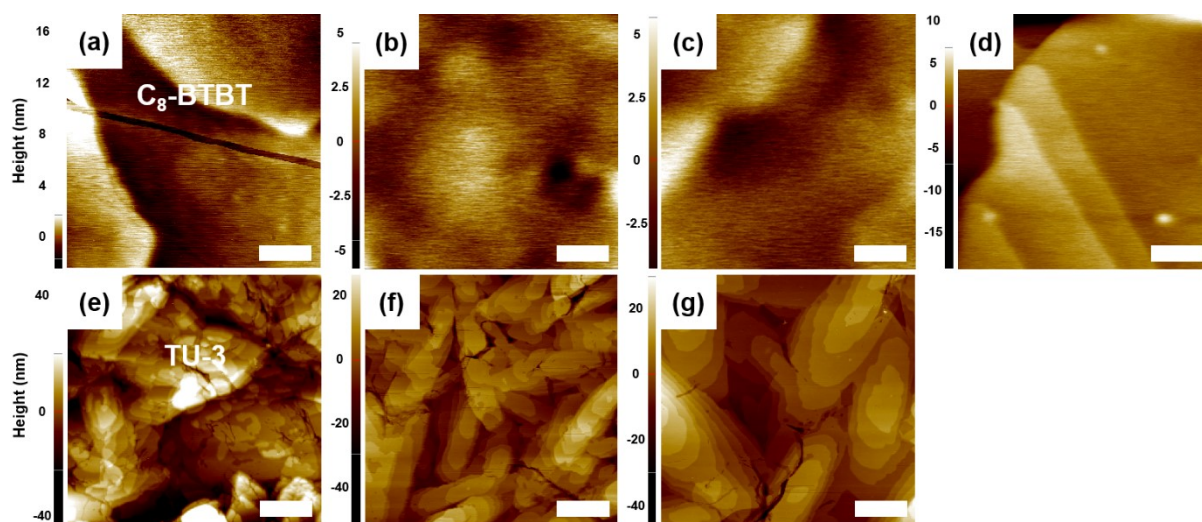

**Fig. S2** AFM images (area size  $10\ \mu\text{m} \times 10\ \mu\text{m}$ ) of the fabricated OSC films according to mixing ratio of binary solvents for  $\text{C}_8\text{-BTBT}$  (a) single CF, (b) CF and 2-MeTHF (7:3), (c) CF and 2-MeTHF (6:4), (d) CF and 2-MeTHF (5:5), for TU-3 (e) single CB, (f) CB and DES (8:2) and (g) CB and DES (7:3). (CF: chloroform, 2-MeTHF: 2-methyl tetrahydrofuran, CB: chlorobenzene, DES: diethyl succinate).

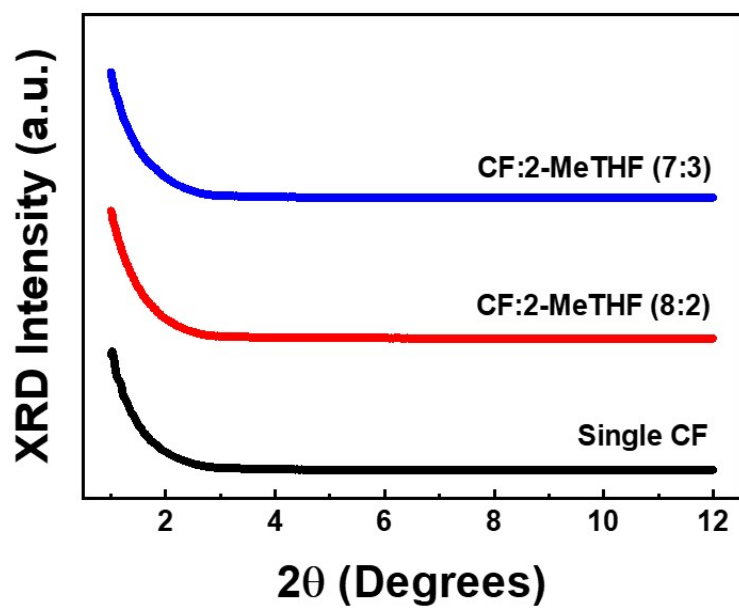

**Fig. S3** XRD profiles of the P(NDI2OD-T2) films according to mixing ratio of binary solvents. (CF: chloroform, 2-MeTHF: 2-methyl tetrahydrofuran).

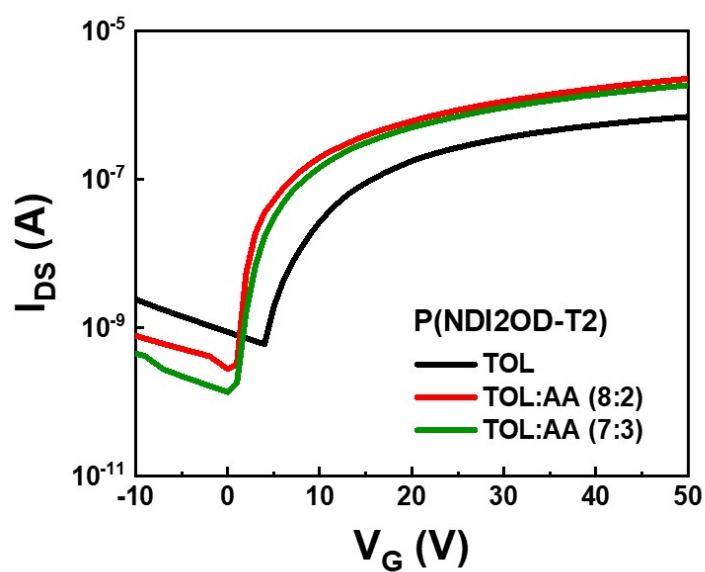

**Fig. S4** Transfer characteristics of OFETs depending on mixing ratio of binary solvent for P(NDI2OD-T2) based on single TOL and TOL and AA. Corresponding charge carrier mobilities were 0.026, 0.078 and 0.065  $\text{cm}^2/\text{Vs}$  for single TOL, TOL:AA (8:2), TOL:AA (7:3), respectively. (TOL: toluene, AA: n-amyl acetate).

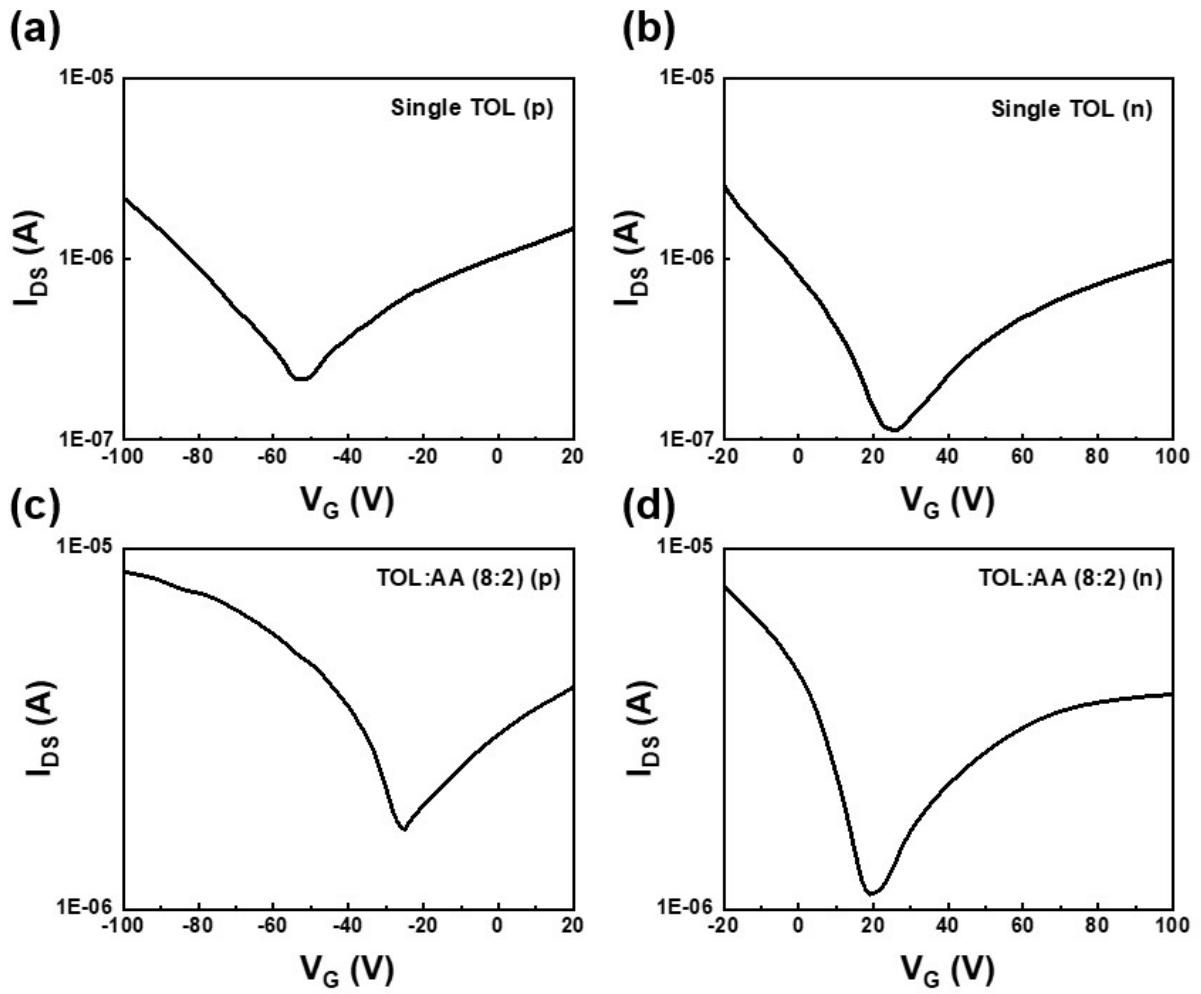

**Fig. S5** Transfer characteristics for ambipolar OFETs based on single TOL, (a) p-type, (b) n-type and for ambipolar OFETs based on TOL and AA (8:2), (c) p-type and (d) n-type. (TOL: toluene, AA: n-amyl acetate).  $V_G = V_D = -100$  V and  $V_G = V_D = 100$  V for p- and n-type OFETs, respectively.



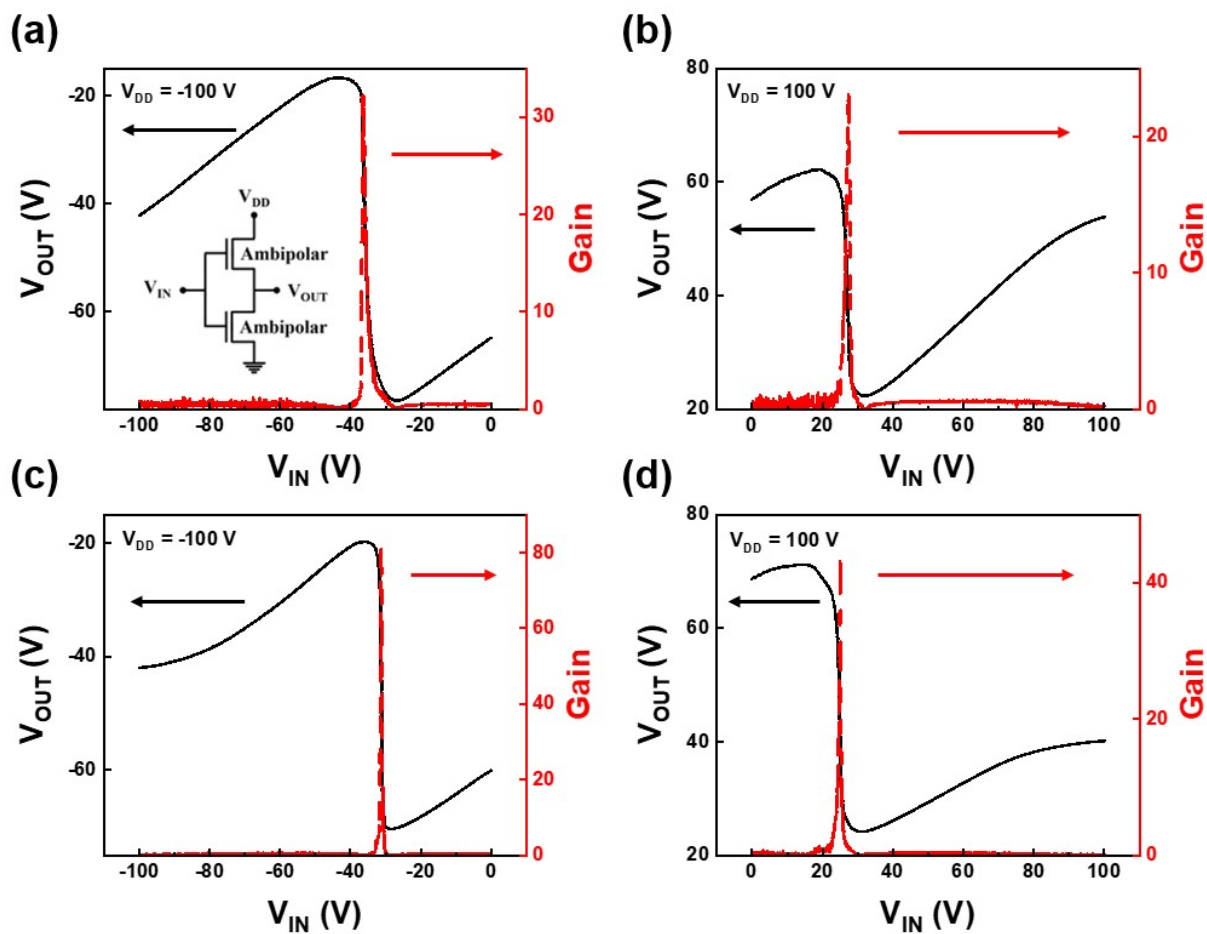

**Fig. S6** Voltage transfer characteristics of complementary-like inverter using two ambipolar OFETs based on TIPS-pentacene and P(NDI2OD-T2) blend (a), (b) with single TOL and (c), (d) with binary solvent consisting of TOL and AA (8:2). The inset shows the circuit diagram. (TOL: toluene, AA: n-acyl acetate).
